# Genotyping of Human Lice Suggests Multiple Emergences of Body Lice from Local Head Louse Populations

Wenjun Li<sup>1‡</sup>, Gabriel Ortiz<sup>1</sup>, Pierre-Edouard Fournier<sup>1</sup>, Gregory Gimenez<sup>1</sup>, David L. Reed<sup>2</sup>, Barry Pittendrigh<sup>3</sup>, Didier Raoult<sup>1\*</sup>

**1** URMITE, UMR CNRS 6236, IRD 198, Université de la Méditerranée, Faculté de Médecine, Marseille, France, **2** Florida Museum of Natural History, Dickinson Hall, University of Florida, Gainesville, Florida, United States of America, **3** Department of Entomology, University of Illinois at Urbana-Champaign, Urbana, Illinois, United States of America

## Abstract

**Background:** Genetic analyses of human lice have shown that the current taxonomic classification of head lice (*Pediculus humanus capitis*) and body lice (*Pediculus humanus humanus*) does not reflect their phylogenetic organization. Three phylotypes of head lice A, B and C exist but body lice have been observed only in phylotype A. Head and body lice have different behaviours and only the latter have been involved in outbreaks of infectious diseases including epidemic typhus, trench fever and louse borne recurrent fever. Recent studies suggest that body lice arose several times from head louse populations.

**Methods and Findings:** By introducing a new genotyping technique, sequencing variable intergenic spacers which were selected from louse genomic sequence, we were able to evaluate the genotypic distribution of 207 human lice. Sequence variation of two intergenic spacers, S2 and S5, discriminated the 207 lice into 148 genotypes and sequence variation of another two intergenic spacers, PM1 and PM2, discriminated 174 lice into 77 genotypes. Concatenation of the four intergenic spacers discriminated a panel of 97 lice into 96 genotypes. These intergenic spacer sequence types were relatively specific geographically, and enabled us to identify two clusters in France, one cluster in Central Africa (where a large body louse outbreak has been observed) and one cluster in Russia. Interestingly, head and body lice were not genetically differentiated.

**Conclusions:** We propose a hypothesis for the emergence of body lice, and suggest that humans with both low hygiene and head louse infestations provide an opportunity for head louse variants, able to ingest a larger blood meal (a required characteristic of body lice), to colonize clothing. If this hypothesis is ultimately supported, it would help to explain why poor human hygiene often coincides with outbreaks of body lice. Additionally, if head lice act as a reservoir for body lice, and that any social degradation in human populations may allow the formation of new populations of body lice, then head louse populations are potentially a greater threat to humans than previously assumed.

**Citation:** Li W, Ortiz G, Fournier P-E, Gimenez G, Reed DL, et al. (2010) Genotyping of Human Lice Suggests Multiple Emergences of Body Lice from Local Head Louse Populations. *PLoS Negl Trop Dis* 4(3): e641. doi:10.1371/journal.pntd.0000641

**Editor:** Genevieve Milon, Institut Pasteur, France

**Received:** September 4, 2009; **Accepted:** February 8, 2010; **Published:** March 23, 2010

**Copyright:** © 2010 Li et al. This is an open-access article distributed under the terms of the Creative Commons Attribution License, which permits unrestricted use, distribution, and reproduction in any medium, provided the original author and source are credited.

**Funding:** The authors received no specific funding for this paper.

**Competing Interests:** The authors have declared that no competing interests exist.

\* E-mail: Didier.raoult@gmail.com

‡ Current address: Department of Molecular Genetics and Microbiology, Duke University Medical Center, Research Drive, Durham, NC, 27710, USA.

## Introduction

Lice are extremely well-adapted ectoparasites that are usually host-specific [1]. Three recognized taxa of lice feed on humans: head lice (*Pediculus humanus capitis*), body lice (*Pediculus humanus humanus*), and pubic lice (*Phthirus pubis*), feed on humans. As one of the most intimate parasites of humans, lice have been widely used as a genetic model to infer host evolutionary history by providing genetic date independent of host data [1,2]. Several nuclear and mitochondrial DNA sequences have previously been used in population genetic studies of human lice. Of these, the nuclear DNA sequences, *EF-1 $\alpha$*  and 18S rDNA, discriminated lice into two subgroups, lice from Sub-Saharan Africa and

lice worldwide [3]. In each subgroup, the head lice were genetically different from the body lice [3]. However, Leo *et al.* suggested that 18S rDNA phylogeny was concordant with the phylogenies from mitochondrial genes, but the *EF-1 $\alpha$*  phylogeny was concordant neither with the mitochondrial phylogenies nor with the 18S rRNA phylogeny [4]. Furthermore, the mitochondrial DNA markers, partial *COI* and *cytB* classified the lice into three deeply divergent clades (Clades A, B, and C), and each having unique geographical distribution. Clade A includes both head and body lice and is worldwide in distribution. Clade B consists only of head lice from America, Australia and Europe, and Clade C consists only of lice from Ethiopia and Nepal [5].

## Author Summary

While being phenotypically and physiologically different, human head and body lice are indistinguishable based on mitochondrial and nuclear genes. As protein-coding genes are too conserved to provide significant genetic diversity, we performed strain-typing of a large collection of human head and body lice using variable intergenic spacer sequences. Ninety-seven human lice were classified into ninety-six genotypes based on four intergenic spacer sequences. Genotypic and phylogenetic analyses using these sequences suggested that human head and body lice are still indistinguishable. We hypothesized that the phenotypic and physiological differences between human head and body lice are controlled by very limited mutations. Under conditions of poor hygiene, head lice can propagate very quickly. Some of them will colonize clothing, producing a body louse variant (genetic or phenetic), which can lead to an epidemic. Lice collected in Rwanda and Burundi, where outbreaks of louse-borne diseases have been recently reported, are grouped tightly into a cluster and those collected from homeless people in France were also grouped into a cluster with lice collected in French non-homeless people. Our strain-typing approach based on highly variable intergenic spacers may be helpful to elucidate louse evolution and to survey louse-borne diseases.

More variable genetic markers, such as internal transcribed spacers (*ITS*) of ribosomal DNA and microsatellite DNA, were also used to deduce the louse phylogeny. However, the *ITS* that was chosen was not useful to study the populations structure of human lice because some of the lice had more than one copy of *ITS2* in their genome [6]. A subsequent microsatellite DNA-based study has suggested that human head and body lice are genetically distinct [7], however recent studies contradict this hypothesis [5,8]. Taken together, the population structure of human lice is complex and still unclear. The previously used genetic markers were mostly mitochondrial and nuclear genes that were too conserved to generate more information of genetic diversity of studied louse isolates. So far, no genetic marker has been found that can discriminate among individual human lice.

While being used as a suitable genetic model to study the evolutionary history of humans, lice have long been associated with infectious diseases. Of the three types of lice associated with humans, body lice can be a serious public health problem because they are known vectors of *Rickettsia prowazekii*, *Bartonella quintana*, and *Borrelia recurrentis*, which cause epidemic typhus, trench fever and relapsing fever in humans, respectively [9]. However, medical interest in louse-borne diseases had waned for more than 30 years until 1997, when an outbreak of infection of louse-transmitted *R. prowazekii* and *B. quintana* occurred among the displaced population of Burundi [10,11].

Body lice have long been recognized as human parasites and although typically prevalent in rural communities in upland areas of countries close to the equator, high incidence of louse-borne infections are also increasingly found in the homeless in developed countries [9,12,13]. In contrast, head lice represent a major economic and social concern throughout developed nations, because head louse infestations are often associated with school-aged children.

Faster evolving molecular markers are needed in order to epidemiologically survey the vectors of these bacterial infections and to address more recent population-level questions, [8,14]. Among these fast-evolving genetic markers, intergenic spacers are promising

for individual discrimination of lice because they are under less evolutionary pressure, and are more variable than coding genes. These factors make intergenic spacers useful for understanding the population genetics of lice. Highly variable intergenic spacers are useful for strain-typing many bacteria, including louse-transmitted *R. prowazekii* and *B. quintana* [15,16] as well as other pathogenic bacteria [17]. Additionally, intergenic spacer sequences for individual discrimination of lice, are now publicly available [14]. In this study, we used four highly variable intergenic spacers that were selected from the genomic sequence to study the genotypic distribution of a large collection of lice of worldwide origins.

## Methods

### Louse collection and DNA preparation

Two hundred and eighty-four human lice collected from Russia, France, Portugal, Mexico, USA, UK, Morocco, Algeria, Peru, Thailand, Australia, Rwanda, and Burundi were included in this study. Lice were collected by experienced entomologists from patients who had only one type of infestation (head or body) and classified according to the site where they were found. Among them, only 97 lice were tested with four nuclear intergenic spacers, other 110 and 77 lice were tested with two intergenic spacers, respectively, due to limited DNA quantity. The strain information, including origin, the body part where they were removed (body or head), and the year when it was collected are given in Figure 1 and Figures S1 and S3. In addition, to estimate the utility of multi-spacer typing (MST) of louse populations, we also studied two body lice from our laboratory colony (Culpeper strain) per year, collected in 1998, 1999, 2000, 2003, 2004 and 2009. From 1998 to 2009, our louse colony went through 132 generations.

All lice were stored at  $-20^{\circ}\text{C}$  until processed further. Before DNA isolation, each louse was rinsed twice in sterile water for 15 minutes and cut lengthwise in half. Then, total genomic DNA of each half louse was extracted using the QIAamp Tissue kit (QIAGEN, Hilden, Germany) as described by the manufacturer. The extracted genomic DNA was stored at  $-20^{\circ}\text{C}$  until PCR amplification.

### Selection of nuclear intergenic spacers as typing markers and primer design

The nuclear intergenic spacers were randomly selected from the genomic sequence of *Pediculus humanus humanus* UDSA strain (<http://phumanus.vectorbase.org/index.php>) and were identified with flanking genes which exhibited  $>40\%$  sequence identity with homologous genes in the Vectorbase [14,18]. Primers used for amplification and sequencing of these intergenic spacers were chosen from the flanking genes using the Primer 3.0 software ([http://frodo.wi.mit.edu/cgi-bin/primer3/primer3\\_www.cgi](http://frodo.wi.mit.edu/cgi-bin/primer3/primer3_www.cgi)) and are listed in Table 1. All Primers used in this project were obtained from Eurogentec (Seraing, Belgium).

As the testing of all intergenic spacers on all louse samples was labor intensive, a panel of 16 lice from a wide range of origins was first used to test for the validity and the presence of polymorphisms for each of the intergenic spacers. Subsequently, the intergenic spacers with successful amplification and sequencing from the 16 tested louse samples, were finally used as markers in order to genotype the remaining strains.

### Amplification and sequencing of intergenic spacers

PCR amplification of each intergenic spacer was carried out in a PTC-200 automated thermal cycler (MJ Research, Waltham, MA, USA). 1  $\mu\text{l}$  of each DNA preparation was amplified in a 20  $\mu\text{l}$  reaction mixture containing 10 pM of each primer, 2 mM of each nucleotide



**Table 1.** The name, position on supercontig, size, and primers used for amplification of 22 intergenic spacers.

| Name | Start  | End    | Foward primer (5'-3')   | Reverse primer (5'-3') | Size (bp) |
|------|--------|--------|-------------------------|------------------------|-----------|
| S1   | 27999  | 28435  | GACCAACCAACCAGCCAATA    | TTCCAGAAGCCTTGTACCG    | 437       |
| S2   | 665433 | 665920 | ATGATGTGCATTGCGAGTGT    | AAACTTAACCCGGGCCCTAT   | 488       |
| S3   | 44210  | 44721  | GAAAGTGACGACGATGACGA    | TCCCAATTTTTGTTCCCTG    | 512       |
| S4   | 76618  | 77129  | ACCCGATAAACCCGACAGATG   | TTTGCCCATACAGCAATTCA   | 512       |
| S5   | 69159  | 69650  | TCCAAATGAAACCCACACTTT   | TGGCAGACACTGCTTCCTTA   | 492       |
| S6   | 63422  | 63928  | AACAAAACAATTTGACCCGC    | GCATCTTAAATCCGACAATTTT | 507       |
| S7   | 188992 | 189457 | ATGATTGCATCACTCCGTCA    | CGTTGAGGAATCTGGCATT    | 466       |
| S8   | 64865  | 65355  | GGATTGCAAAAAGCGGATA     | ATTTGCCGGTAGGGTACTT    | 491       |
| S9   | 292090 | 292560 | AAGTTTTGTGCTCAAAGCG     | AATTCGACAGCGTAAAGCGT   | 471       |
| S10  | 86299  | 86794  | TCTTAGCAAACTTGGTGATGAG  | TGCCTGAAGAGCTTCAATT    | 496       |
| S11  | 22923  | 23408  | AGGAATTGGATGAATTGCTCA   | ATGACTGTGACTTCCAGCCC   | 486       |
| S12  | 20812  | 21327  | CCGCTGAACGAATCTTCTC     | TCATCCCTGTTTTCCACC     | 516       |
| S13  | 155485 | 155887 | TGGTTGTTTTTACCATTG      | AAACCCGAGCGAATGTTTT    | 403       |
| S14  | 228690 | 229166 | TAATACGGAAAAATGCGTCG    | CGATCGGAATTGTGAGGTTT   | 477       |
| S15  | 279599 | 280127 | CCTGAACAACCTGAAAGAATTGC | GGCAAGCCAAAACACCTAAA   | 529       |
| S16  | 41948  | 42461  | GGGGAAATAAAAACAGAGGAGG  | CAACCCGGGTGACCACATTAT  | 514       |
| S17  | 248360 | 248834 | TGATTTAGGTGGATTTACGGG   | TTTCCAACGAATTTGGAACC   | 475       |
| S18  | 321921 | 322390 | ATCTCTGTTTTAGTGGCGG     | TCTGGTTTACAGGTGTGCAAAA | 470       |
| S19  | 204723 | 205216 | AAAACAACAGACGTAGAAAAGCG | GGGGGTAAACAAAATGGGTAA  | 494       |
| S20  | 603    | 1045   | GGATTTCTGTTTTGCGTTTT    | TTGGTTCTGCATGAAATACGTT | 443       |
| PM1  | 538639 | 538857 | GAAATAATATCCAACCTCGTTCA | CATTCTTCTCATCAAGCTGC   | 217       |
| PM2  | 115253 | 115810 | CCGAAGGAGCTGATCTTTT     | CCACAACGAGTGATGTGAGC   | 437       |

doi:10.1371/journal.pntd.0000641.t001

## Results

### Four nuclear intergenic spacers, S2, S5, PM1, and PM2, were selected as typing markers

Twenty-two nuclear intergenic spacers were initially selected from the genomic sequences and preliminary tested on 16 louse samples (Table 1). However, due to non-specific amplification, or low sequencing quality, 18 intergenic spacers were removed from this study. Finally, four intergenic spacers, hereafter termed S2, S5, PM1, and PM2, were used as typing markers in this study (Table 1).

Through amplification and sequencing, 165–185 bp of S2 and 156–189 bp of S5 were obtained from 207 louse samples and 133–155 bp of PM1 and 323–328 bp of PM2 were obtained from 174 louse samples. Sequences from the different genotypes of the four intergenic spacers have been deposited in the EMBL/GenBank database with access numbers: EU928781-EU928862 for S2 and S5 and EU913096-EU913223 for PM1 and PM2.

### Genotypic distribution of studied lice based on intergenic spacers

Two hundred and seven lice were differentiated into 84 and 49 genotypes based on intergenic spacers S2 and S5, respectively. Concatenation of S2 and S5 sequences differentiated the 207 lice into 148 genotypes.

One hundred and seventy-four lice were differentiated into 25 and 62 genotypes based on intergenic spacers PM1 and PM2, respectively. Concatenation of PM1 and PM2 sequences differentiated the 174 lice into 77 genotypes.

Further concatenation of S2, S5, PM1, and PM2, discriminated a panel of 97 lice into 96 MST genotypes. Except for two lice

collected from French homeless people which shared the MST genotype 89, the other 90 lice exhibited unique MST genotypes based on the concatenation of four intergenic spacers.

Sequences from each of the four intergenic spacers S2, S5, PM1, and PM2 were identical among the 12 body lice from our laboratory colony collected over 12 years. The genotypes obtained were: 8, 6, 18, and 39 for S2, S5, PM1 and PM2, respectively.

### Genotypic distribution of lice based on the mitochondrial gene *cytB*

A partial *cytB* gene sequence was amplified and sequenced from 170 lice. A 316 bp fragment was obtained from each louse after sequence correction and assembling. The *cytB* sequences were used to classify the 170 lice into 11 genotypes. The body lice sampled from our laboratory colony over 132 generations exhibited identical *cytB* sequences (genotype 4).

### Discriminatory power of each marker

The discriminatory power (D) of the intergenic spacers, PM1, PM2, S2, and S5 was respectively 0.6988, 0.8406, 0.9677, and 0.8913. The D value of *cytB* was 0.6445. The D value of concatenation of intergenic spacers varied from 0.9123 for concatenation of PM1 and PM2 to 0.9945 for concatenation of S2 and S5. A D value of 0.9998 was reached by combined use of the four intergenic spacers.

### Phylogenetic organization of lice based on intergenic spacers and partial *cytB*

The dendrograms of studied lice inferred by the methods of neighbor-joining, maximum parsimony, and maximum likelihood

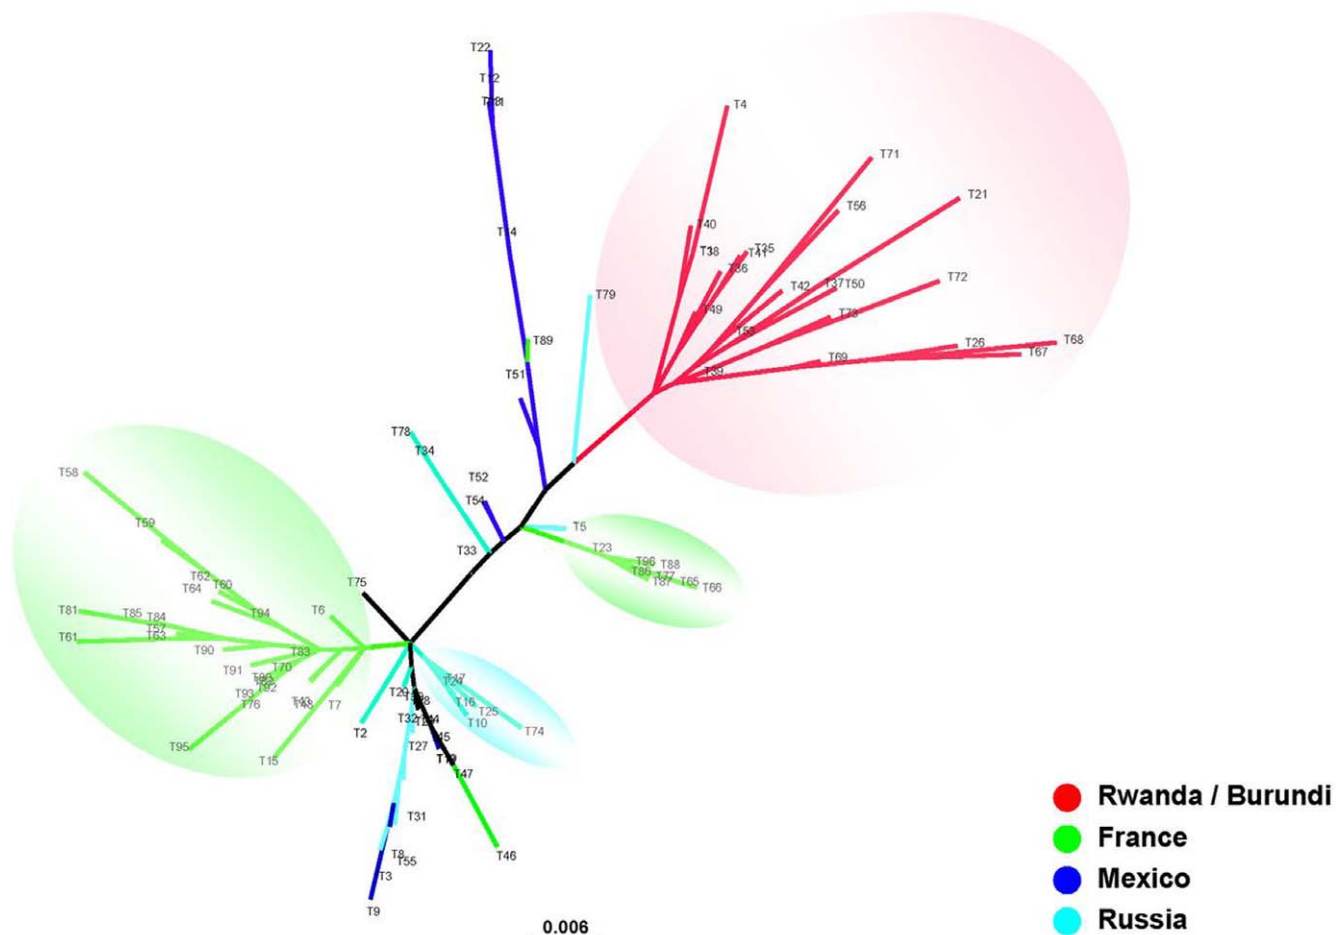

**Figure 2. Phylogenetic organization of 97 human lice based on concatenation of four nuclear intergenic spacers, PM1, PM2, S2, and S5, using the maximum likelihood method.**  
doi:10.1371/journal.pntd.0000641.g002

exhibited similar phylogenetic organizations (Figures 1 – 3, Figures S1 – S6).

The 148 genotypes of intergenic spacers S2 and S5, were grouped into 3 clusters, C1, C2, and C3 (Figure S1). Each cluster included both head and body lice. In addition, genotypes 96 and 101 consisted of two body lice and two head lice, respectively (Figure S1). A subcluster (Burundi and Rwanda subcluster) in cluster C3 was comprised of 29 lice from Burundi and Rwanda and one louse from Russia. The other 24 lice collected in Rwanda and Burundi were grouped into cluster C2. The majority of French lice, including those collected from

homeless people, were grouped into a sub-clade within cluster C1 (Figure S1).

The 77 nuclear intergenic spacer-genotypes, for PM1 and PM2, were grouped into 2 distinct clusters (Figure S3). Cluster C1 included 148 lice collected from Russia, Mexico, France, UK, USA, and Portugal as well as one louse from Rwanda (Figure S3). A subcluster in cluster C1 contained 31 lice from France and 2 lice from Portugal, which is hereafter referred to as the “French subcluster”. The 19 lice collected from French homeless individuals were tightly grouped with French lice in cluster C1 (Figure S3). Cluster C2 was comprised of 25 lice collected from

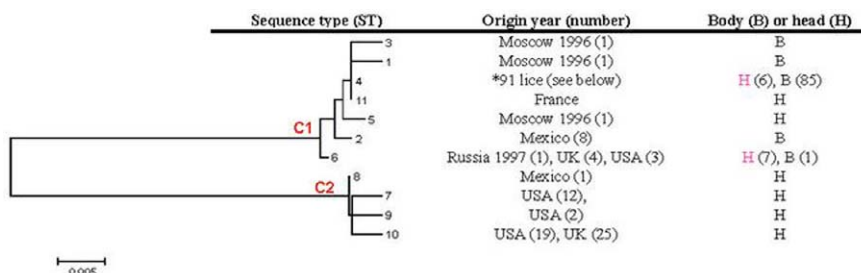

**Figure 3. Phylogenetic organization of 170 human lice based on partial *cytB* gene using using the neighbor-joining method.**  
doi:10.1371/journal.pntd.0000641.g003

Rwanda and Burundi. Genotypes 6, 29, and 32, were observed in both head and body lice.

Based on the concatenation of the four intergenic spacers PM1, PM2, S2, and S5, the 97 lice were discriminated into 96 MST genotypes and grouped into two clusters (Figures 1 and 2). Cluster C1 included 75 lice from Russia, France, Mexico, and Portugal, and Cluster C2, the Burundi and Rwanda cluster, contained 22 lice from Burundi and Rwanda (Figure 1). Lice collected from the French homeless individuals were tightly grouped with French lice into two subclusters within C1 (Figure 1).

The 11 genotypes of *cytB* from 170 lice were grouped into 2 clusters (Figure 3). Cluster C1 included 111 lice from France, Russia, UK, USA, Mexico, Portugal, Burundi, and Rwanda (Figure 3), and corresponded to Type A in a study by Light *et al* [5]. Cluster C2 included 59 lice from the UK, USA, and Mexico, and corresponded to the Type B reported by Light *et al.* [5]. Genotypes 4 and 6 comprised both head and body lice.

## Discussion

In this study, MST based on four highly variable intergenic spacers selected from the genomic sequence of a body louse, classified 97 lice into 96 MST genotypes. To date, MST appears to be the most sensitive discriminatory genotyping system of human lice, allowing for discrimination of individuals. In addition, MST helped us to address several important debates associated with human lice. One of the ongoing debates is whether head and body lice are separate species or two subspecies within *Pediculus humanus* [3,4,7,8,26]. To address this issue, most of the previous studies have used mitochondrial or nuclear genes to evaluate and compare the genetic variability of human head and body lice. Studies based on the mitochondrial gene *COI* [26], the mitochondrial genes *cytB* and *ND4* and nuclear genes *EF-1 $\alpha$*  and *RPII* [27], the mitochondrial genes *cytB* and *COI* [28], or the nuclear gene 18S rDNA [4], supported the hypothesis that human head and body lice are conspecific. Using previously published sequence data, by reticulated networks, gene flow, population genetics, and phylogeny analysis, Light *et al.* [8] also observed that human head and body lice are conspecific.

However, a recent study performed by Leo *et al.* [7], in which microsatellites were used as genetic markers, concluded that human head and body lice are two distinct species. These studies made opposite conclusions by using different genetic markers. The low discriminatory power of previously used markers limited their ability to provide convincing evidence whether head and body lice are subspecies of one species or two distinct species.

Our genotypic and phylogenetic analyses using MST did not support the hypothesis that human head and body lice are separate species. For instance, genotype 32, which was a concatenation of the intergenic spacers PM1 and PM2, was comprised of 44 head lice from the USA and the UK as well as one body louse from Europe (Figure S3). Genotypes 6 and 29 were comprised of both head and body lice collected in France (Figure S3). Genotypes 96 and 101, a concatenation of the intergenic spacers S2 and S5, also were comprised of both head and body lice (Figure S1).

Phylogenetic organizations of head and body lice based on each of the four intergenic spacers, and on concatenation of both, support the hypothesis that head lice were grouped with body lice in the same clusters or subclusters (Figure 1, Figures S1 and S2). The changing tree topography observed among spacers may be related to differences in selection pressure that their flanking genes undergo. The genotypic distribution of 170 lice based on partial *cytB* gene sequences, and the phylogenetic organization of 11 *cytB*

genotypes, also demonstrated that head and body lice shared the same *cytB* genotypes and were grouped in the same cluster (Figure 2), which further confirmed the hypothesis that human head and body lice are conspecific [3,27,28].

In our study, although only two clusters were observed based on partial *cytB* gene sequences, cluster C1 contained both head and body lice from worldwide origins, and cluster C2 included only head lice from America and Europe (Figure 3). This result did not contradict the previous observation [19] of three deeply divergent clades of human lice, as our study did not include lice from either Ethiopia or Nepal. However, the phylogenetic organization of *cytB* sequences was significantly simpler than those based on intergenic spacers. Three and two clusters were respectively obtained from the concatenations of the intergenic spacers S2 and S5 (Figure S1), and the intergenic spacers PM1 and PM2 (Figure S3). Additionally, two clusters were generated from the concatenation of the four intergenic spacers PM1, PM2, S2 and S5 (Figure 1, Figures S1 and S2). Each cluster was comprised of several subclusters, such as the French subcluster, including the majority of French lice, and the Rwanda/Burundi cluster, which also consisted of lice collected from sub-Saharan Africa (Figure 1, Figures S1 and S2). This discrepancy of phylogenetic organizations obtained from intergenic spacers and *cytB* sequences resulted, at least partially, from the high variability of intergenic spacers, which enabled individual discrimination of human lice. In addition, these differences may also be explained by the fact that the louse samples incorporated in each phylogenetic analysis were different due to limited DNA available for such experiments. Furthermore, louse genomic DNA may be highly recombined, which would in turn result in distinct phylogenetic organization from different markers [8]. Thus, collecting more louse samples with wide origins, especially lice from Ethiopia and Nepal, and subjecting them to MST analysis, would help to further clarify the relationship between head and body lice.

Human head and body lice are strict obligate human ectoparasites that differ in several aspects of their morphology, physiology and life histories. Head lice are mostly found on the head and attach their eggs to the base of hair shafts, whereas body lice reside in clothing and attach their eggs to clothing fiber, a life history strategy that probably arose when humans first began wearing clothes [27]. By comparison with body lice, head lice have been described as having shorter and broader antennae, shorter legs, more marked indentations between successive abdominal plates, and as being larger and more deeply pigmented [29,30]. However, such morphological differences have been determined on a small number of lice and may not hold at the species level [29]. Body lice also take a larger blood meal, lay higher numbers of eggs and develop faster than head lice [29,31,32]. In addition, body lice are more resistant to environmental conditions, can stay alive for longer period of time outside the host, are able of transmitting infectious diseases, and are mostly found in adults whereas head lice are essentially found in children [29]. Despite various genetic differences [1–8], detailed above, head and body lice have been shown to be able to interbreed [30].

Lice are extremely well adapted ectoparasites, which are usually host-specific by co-speciation with their host [2,28,33]. Thus, lice have become a good genetic model for studying specific aspects of human evolution, including addressing when our human ancestors began to wear clothing. Very recently, a study based on sequence analysis of *COI* and *cytB* from human head and body lice suggested direct contact between modern and archaic humans [28]. More recently, Light *et al.* [34] verified this hypothesis by using both nuclear and mitochondrial genes [34]. However, these studies were based on conserved mitochondrial or nuclear genes, which

provided limited genetic variability of studied lice. In our study, we also tested the use of highly variable intergenic spacers for strain-typing of human lice to explore human evolutionary history. Concatenation of these highly variable intergenic spacer sequences classified some lice from Rwanda and Burundi into a basal cluster or subcluster and grouped other lice collected in Rwanda and Burundi with lice from North Africa, Europe, USA, and Asia, which supports the hypothesis that human beings originated in Africa (Figure 1, Figures S1 and S2). Thus, highly variable intergenic spacer sequences could be used to study the evolution history of human lice and its host. It might be argued that, due to fast evolution and high polymorphism, intergenic spacers may not be able to fully reflect long-term dynamic changes of populations. However, we observed that MST was a valuable tool for tracing distinct louse populations, and was not biased by mutations that might arise within a single population over time, for at least 132 generations. Nevertheless, we recommend using a combination of coding genes and intergenic spacers because coding genes are conserved enough to highlight evolutionary relationships, and the intergenic spacers are variable enough to identify fine-scale genetic variability.

While lice may present a valuable model to study its host evolution, human head and body lice cause serious health and social problems. Head lice are common worldwide, infesting millions of school children every year and the resistance of *Pediculus humanus capitis* to insecticides is spreading [35]. Body lice are less prevalent parasites, associated mainly with those living in poor conditions, but are potentially more harmful because they are known vectors of at least three bacterial pathogens in humans: *R. prowazekii*, *B. quintana*, and *B. recurrentis*. There have been several outbreaks of louse-borne *R. prowazekii* infections in Burundi and Rwanda jails in 1997 and 2001, and sporadic *R. prowazekii* infections were also recently reported [9]. Epidemiological surveys of these louse-borne diseases are also very important for us to understand and potentially combat these diseases. In addition, recent evidence has been brought that head lice are potential vectors of *B. quintana* [36,37], and their role in the epidemiology of epidemic typhus has been questioned [38]. Other studies have identified two endosymbiotic bacteria that have co-evolved in head and body lice [39–41]. However, whether these symbionts have any influence on louse behavior, development and/or competence as disease vectors is as yet mostly unknown.

Based on phylogenetic analysis of the four intergenic spacers, S2, S5, PM1, and PM2 as well as a concatenation of them, the head and body lice collected from Rwanda and Burundi tightly grouped together to form clusters as well as subclusters (Figure 1, Figures S1 and S2). In addition, the lice collected from homeless people in France grouped tightly with those collected in non-homeless French people, which suggested louse populations migrate between homeless people and non-homeless people in France and homeless people are known to be at high risk for louse-borne diseases [9,11,12].

MST may ultimately be a good tool for performing surveys associated with louse transmission and louse-borne diseases. In addition, our MST analysis demonstrated that head and body lice collected in Rwanda and Burundi in 1997, 2001, 2003, and 2008, were closely grouped (Figure 1, Figures S1 and S2). Thus, the outbreak of louse-borne *R. prowazekii* infection that happened in 1997 and 2001 opens up the possibility that lice in this region may still pose a risk for the transmission of *R. prowazekii* to humans. However, clear separation of African lice (collected from Rwanda and Burundi) from other lice was not recovered by intergenic spacers S2 and S5, likely due to recent recombination of nuclear DNA [8].

As mentioned above, head lice are different from body lice morphologically and physiologically. It is possible that these phenotypic differences are controlled by a single mutation or potentially a regulatory gene (or genes) governing, for example, the volume of ingested blood. This is the simplest explanation to understand the genetic data showing that lice have exactly the same origin. Under certain conditions of low hygiene, a head louse infestation can transform into a massive infestation (Figure 4). Certain head lice could colonize clothing (Figure 5), and produce a body louse variant by purifying selection or allotropism, which can in turn generate an epidemic of body lice (Figure 6). Several previous observational studies had also suggested that head lice could become body lice when raised in appropriate conditions [42–44]. If this scenario is true, the body louse reservoir is not autonomous and actually depends upon head lice. Previous work has shown that all body lice arose from mitochondrial Type A [5], which suggests that only that genotype has the ability to evolve into the body louse niche. This also makes it possible to understand the difficulties to eradicate body lice in a community, especially when the patients are surrounded by other individuals that are infested by head lice. In our clinical work in Marseilles, France, despite 10 years of attempts to minimize human louse populations, body lice continually reappear and may be due to the persistence of head louse populations [45,46]. Recent work demonstrating the presence of *B. quintana* in head lice [36,37] suggested that they might also transmit infectious diseases, which supports our hypothesis presented in Figure 6, giving them a greater opportunity to ingest circulating bacteria [29,31], and that head lice are rarely collected and tested, even when present, in outbreaks of louse-borne infections, may explain why head lice have long been considered to be free from human pathogens.

In conclusion, by strain-typing of human head and body lice using both coding sequences and highly variable intergenic spacers, our data supports the hypothesis that human head and body lice belong to the same species. Based on genotypic and phylogenetic analyses, we also hypothesize that head lice may

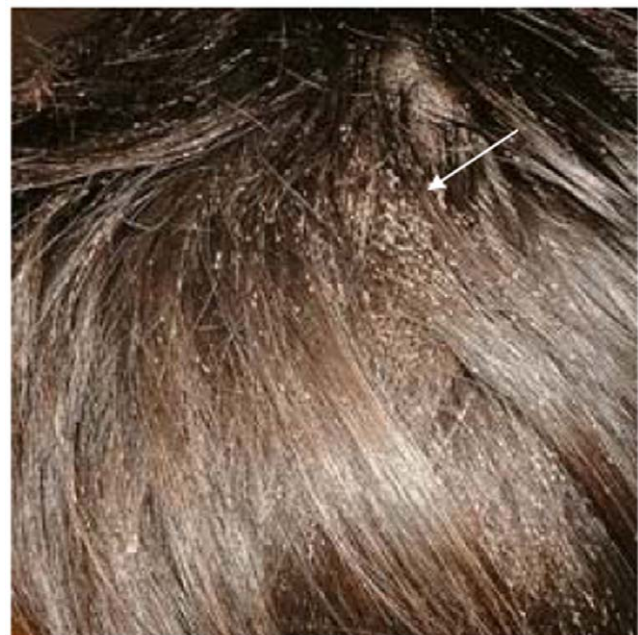

**Figure 4. Heavily infested hair with *Pediculus humanus capitis* (arrow).** The patient gave informed consent for use of this picture. doi:10.1371/journal.pntd.0000641.g004

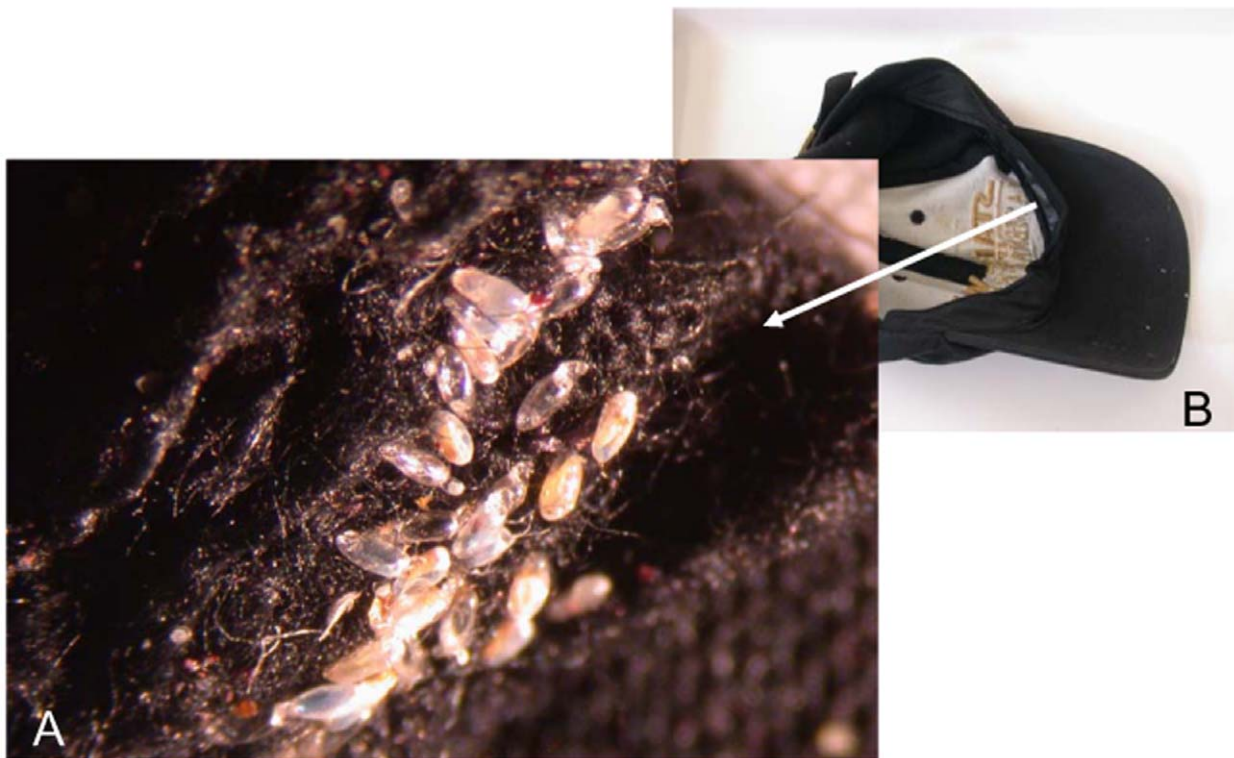

**Figure 5.** *Pediculus humanus capitis* eggs attached to tissues (A) in a cap (B). The patient gave informed consent for use of this picture.  
doi:10.1371/journal.pntd.0000641.g005

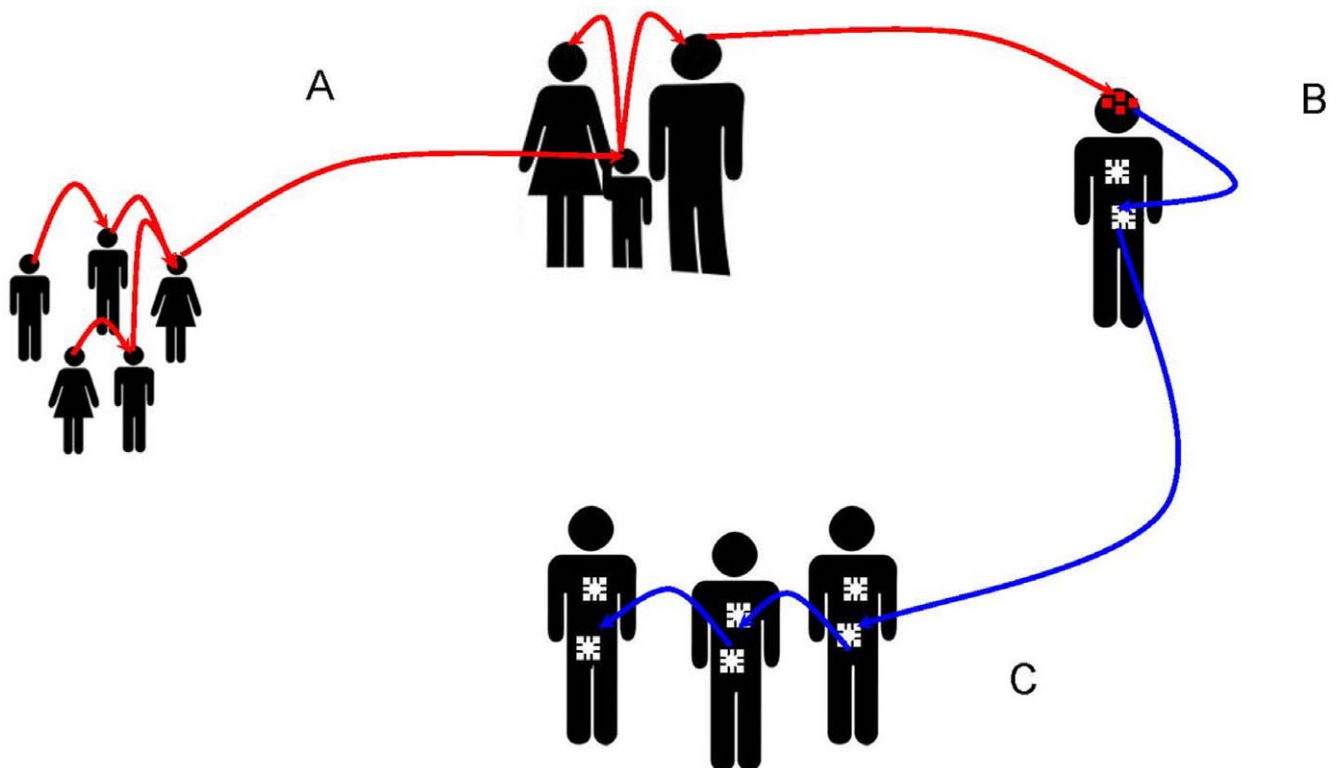

**Figure 6.** Proposed scenario for the evolution of head and body lice. (A) Head lice propagate among humans; (B) in heavily infested patients, head lice might lay eggs in clothes, and resulting lice might develop and subsequently spread among humans as body lice.  
doi:10.1371/journal.pntd.0000641.g006



transform into body lice [47] and cause outbreaks of louse-borne diseases. However, more efforts on the genetic studies of head and body lice are necessary to link their genetic difference with morphological and physiological diversity. Whole genome sequencing of head lice and comparative genomics between head and body lice would be useful to address these questions. In addition, due to its high resolution and reasonable phylogenetic classification, MST based on highly variable intergenic spacer sequences may be helpful for the epidemiological survey of louse-borne diseases.

## Supporting Information

**Figure S1** Phylogenetic organization of 207 human lice based on concatenation of two nuclear intergenic spacers, S2 and S5, using the Neighbor-joining method.

Found at: doi:10.1371/journal.pntd.0000641.s001 (0.02 MB PDF)

**Figure S2** Phylogenetic organization of 207 human lice based on concatenation of two nuclear intergenic spacers, S2 and S5, using the Maximum parsimony method.

Found at: doi:10.1371/journal.pntd.0000641.s002 (0.02 MB PDF)

**Figure S3** Phylogenetic organization of 174 human lice based on concatenation of two nuclear intergenic spacers, PM1 and PM2, using the Neighbor-joining method.

Found at: doi:10.1371/journal.pntd.0000641.s003 (0.04 MB PDF)

## References

- Barker SC (1994) Phylogeny and classification, origins, and evolution of host associations of lice. *Int J Parasitol* 24: 1285–1291.
- Hafner MS, Page RDM (1995) Molecular phylogenies and host-parasite cospeciation: gophers and lice as a model system. *Phil Trans R Soc Lond B* 349: 77–83.
- Yong Z, Fournier PE, Rydkina E, Raoult D (2003) The geographical segregation of human lice preceded that of *Pediculus humanus capitis* and *Pediculus humanus humanus*. *C R Biol* 326: 565–574.
- Leo NP, Barker SC (2005) Unravelling the evolution of the head lice and body lice of humans. *Parasitol Res* 98: 44–47.
- Light JE, Allen JM, Long LM, Carter TE, Barrow L, et al. (2008) Geographic distributions and origins of human head lice (*Pediculus humanus capitis*) based on mitochondrial data. *J Parasitol* 94: 1275–1281.
- Leo NP, Barker SC (2002) Intragenomic variation in ITS2 rDNA in the louse of humans, *Pediculus humanus*: ITS2 is not a suitable marker for population studies in this species. *Insect Mol Biol* 11: 651–657.
- Leo NP, Hughes JM, Yang X, Poudel SK, Brogdon WG, et al. (2005) The head and body lice of humans are genetically distinct (Insecta: Phthiraptera, Pediculidae): evidence from double infestations. *Heredity* 95: 34–40.
- Light JE, Touns MA, Reed DL (2008) What's in a name: the taxonomic status of human head and body lice. *Mol Phylogenet Evol* 47: 1203–1216.
- Raoult D, Roux V (1999) The body louse as a vector of reemerging human diseases. *Clin Infect Dis* 29: 888–911.
- Raoult D, Ndiokubwayo JB, Tissot-Dupont H, Roux V, Faugere B, et al. (1998) Outbreak of epidemic typhus associated with trench fever in Burundi. *Lancet* 352: 353–358.
- Roux V, Raoult D (1999) Body lice as tools for diagnosis and surveillance of re-emerging diseases. *J Clin Microbiol* 37: 596–599.
- Brouqui P, Stein A, Dupont HT, Gallian P, Badiaga S, et al. (2005) Ectoparasitism and vector-borne diseases in 930 homeless people from Marseille. *Medicine (Baltimore)* 84: 61–68.
- Fournier PE, Ndiokubwayo JB, Guidran J, Kelly PJ, Raoult D (2002) Human pathogens in body and head lice. *Emerg Infect Dis* 8: 1515–1518.
- Pittendrigh BR, Clark JM, Johnston JS, Lee SH, Romero-Severson J, et al. (2006) Sequencing of a new target genome: the *Pediculus humanus humanus* (Phthiraptera: Pediculidae) genome project. *J Med Entomol* 43: 1103–1111.
- Foucault C, La Scola B, Lindroos H, Andersson SG, Raoult D (2005) Multispacer typing technique for sequence-based typing of *Bartonella quintana*. *J Clin Microbiol* 43: 41–48.
- Zhu Y, Fournier PE, Ogata H, Raoult D (2005) Multispacer Typing of *Rickettsia prowazekii* enabling epidemiological studies of epidemic typhus. *J Clin Microbiol* 43: 4708–4712.
- Li W, Chomel BB, Maruyama S, Guptil L, Sander A, et al. (2006) Multispacer typing to study the genotypic distribution of *Bartonella henselae* populations. *J Clin Microbiol* 44: 2499–2506.
- Lawson D, Arensburg P, Atkinson P, Besansky NJ, Bruggner RV, et al. (2009) VectorBase: a data resource for invertebrate vector genomics. *Nucleic Acids Res* 37: D583–D587.
- Raoult D, Reed DL, Dittmar K, Kirchman JJ, Rolain JM, et al. (2008) Molecular identification of lice from pre-Columbian mummies. *J Infect Dis* 197: 535–543.
- Altschul SF, Madden TL, Schaffer AA, Zhang J, Zhang Z, et al. (1997) Gapped BLAST and PSI-BLAST: a new generation of protein database search programs. *Nucleic Acids Res* 25: 3389–3402.
- Thompson JD, Higgins DG, Gibson TJ (1994) CLUSTAL W: improving the sensitivity of progressive multiple sequence alignment through sequence weighting, position-specific gap penalties and weight matrix choice. *Nucleic Acids Res* 22: 4673–4680.
- Kumar S, Tamura K, Nei M (2004) MEGA3: Integrated software for Molecular Evolutionary Genetics Analysis and sequence alignment. *Brief Bioinform* 5: 150–163.
- Dereeper A, Guignon V, Blanc G, Audic S, Buffet S, et al. (2008) Phylogeny.fr: robust phylogenetic analysis for the non-specialist. *Nucleic Acids Res* 36: W465–W469.
- Guindon S, Gascuel O (2003) A simple, fast, and accurate algorithm to estimate large phylogenies by maximum likelihood. *Syst Biol* 52: 696–704.
- Hunter PR, Gaston MA (1988) Numerical index of the discriminatory ability of typing systems: an application of Simpson's index of diversity. *J Clin Microbiol* 26: 2465–2466.
- Leo NP, Campbell NJ, Yang X, Mumcuoglu K, Barker SC (2002) Evidence from mitochondrial DNA that head lice and body lice of humans (Phthiraptera: Pediculidae) are conspecific. *J Med Entomol* 39: 662–666.
- Kittler R, Kayser M, Stoneking M (2003) Molecular evolution of *Pediculus humanus* and the origin of clothing. *Curr Biol* 13: 1414–1417.
- Reed DL, Smith VS, Hammond SL, Rogers AR, Clayton DH (2004) Genetic analysis of lice supports direct contact between modern and archaic humans. *PLoS Biol* 2: e340.
- Buxton PA (1950) *The Louse, an account of the lice which infest man, their medical importance and control*. London: Edward Arnold & Co.
- An QJ, Buxton D, Hendricks A, Robinson L, Shah J, et al. (1995) Comparison of amplified Q $\beta$  replicase and PCR assays for detection of *Mycobacterium tuberculosis*. *J Clin Microbiol* 33: 860–867.
- Seki N, Kasai S, Saito N, Komagata O, Mihara M, et al. (2007) Quantitative Analysis of Proliferation and Excretion of *Bartonella quintana* in Body Lice, *Pediculus humanus* L. *Am J Trop Med Hyg*. pp 562–566.
- Speare R, Canyon DV, Melrose W (2006) Quantification of blood intake of the head louse: *Pediculus humanus capitis*. *Int J Dermatol*. pp 543–546.
- Hafner MS, Sudman PD, Villablanca FX, Spradling TA, Demastes JW, et al. (1994) Disparate rates of molecular evolution in cospeciating hosts and parasites. *Science* 265: 1087–1090.
- Light JE, Reed DL (2009) Multigene analysis of phylogenetic relationships and divergence times of primate sucking lice (Phthiraptera: Anoplura). *Mol Phylogenet Evol* 50: 376–390.

35. Heukelbach J, Feldmeier H (2004) Ectoparasites—the underestimated realm. *Lancet* 363: 889–891.
36. Bonilla DL, Kabeya H, Henn J, Kramer VL, Kosoy MY (2009) *Bartonella quintana* in body lice and head lice from homeless persons, San Francisco, California, USA. *Emerg Infect Dis* 15: 912–915.
37. Sasaki T, Poudel SK, Isawa H, Hayashi T, Seki N, et al. (2006) First molecular evidence of *Bartonella quintana* in *Pediculus humanus capitis* (Phthiraptera: Pediculidae), collected from Nepalese children. *J Med Entomol* 43: 110–112.
38. Robinson D, Leo N, Prociw P, Barker SC (2003) Potential role of head lice, *Pediculus humanus capitis*, as vectors of *Rickettsia prowazekii*. *Parasitol Res* 90: 209–211.
39. Allen JM, Reed DL, Perotti MA, Braig HR (2007) Evolutionary relationships of “*Candidatus Riesia* spp.,” endosymbiotic enterobacteriaceae living within hematophagous primate lice. *Appl Environ Microbiol* 73: 1659–1664.
40. Perotti MA, Allen JM, Reed DL, Braig HR (2007) Host-symbiont interactions of the primary endosymbiont of human head and body lice. *FASEB J* 21: 1058–1066.
41. Sasaki-Fukatsu K, Koga R, Nikoh N, Yoshizawa K, Kasai S, et al. (2006) Symbiotic bacteria associated with stomach discs of human lice. *Appl Environ Microbiol* 72: 7349–7352.
42. Sikora H (1917) Zur Kleiderlaus-Kopflausfrage. *Archiv für Schiffs- und Tropenhygiene* 21: 275–284.
43. Nuttall GHF (1919) The biology of *Pediculus humanus*, Supplementary notes. *Parasitology* 11: 201–221.
44. Howlett FM (1918) Notes on head- and body-lice and upon temperature reactions of lice and mosquitoes. *Parasitology* 10: 186–188.
45. Badiaga S, Raoult D, Brouqui P (2008) Preventing and controlling emerging and reemerging transmissible diseases in the homeless. *Emerg Infect Dis* 14: 1353–1359.
46. Badiaga S, Foucault C, Rogier C, Doudier B, Rovey C, et al. (2008) The effect of a single dose of oral ivermectin on pruritus in the homeless. *J Antimicrob Chemother* 62: 404–409.
47. Levene H, Dobzhansky T (1959) Possible genetic differences between the head and the body louse (*Pediculus humanus* L.). *Am nat* 873: 347–353.
