# Supplementary material for: Genotyping of Human Lice Suggests Multiple Emergences of Body Lice from Local Head Louse Populations
Source: PubMed Central journal article supplement (PMC2843630; doi:10.1371/journal.pntd.0000641), 2010-03-23

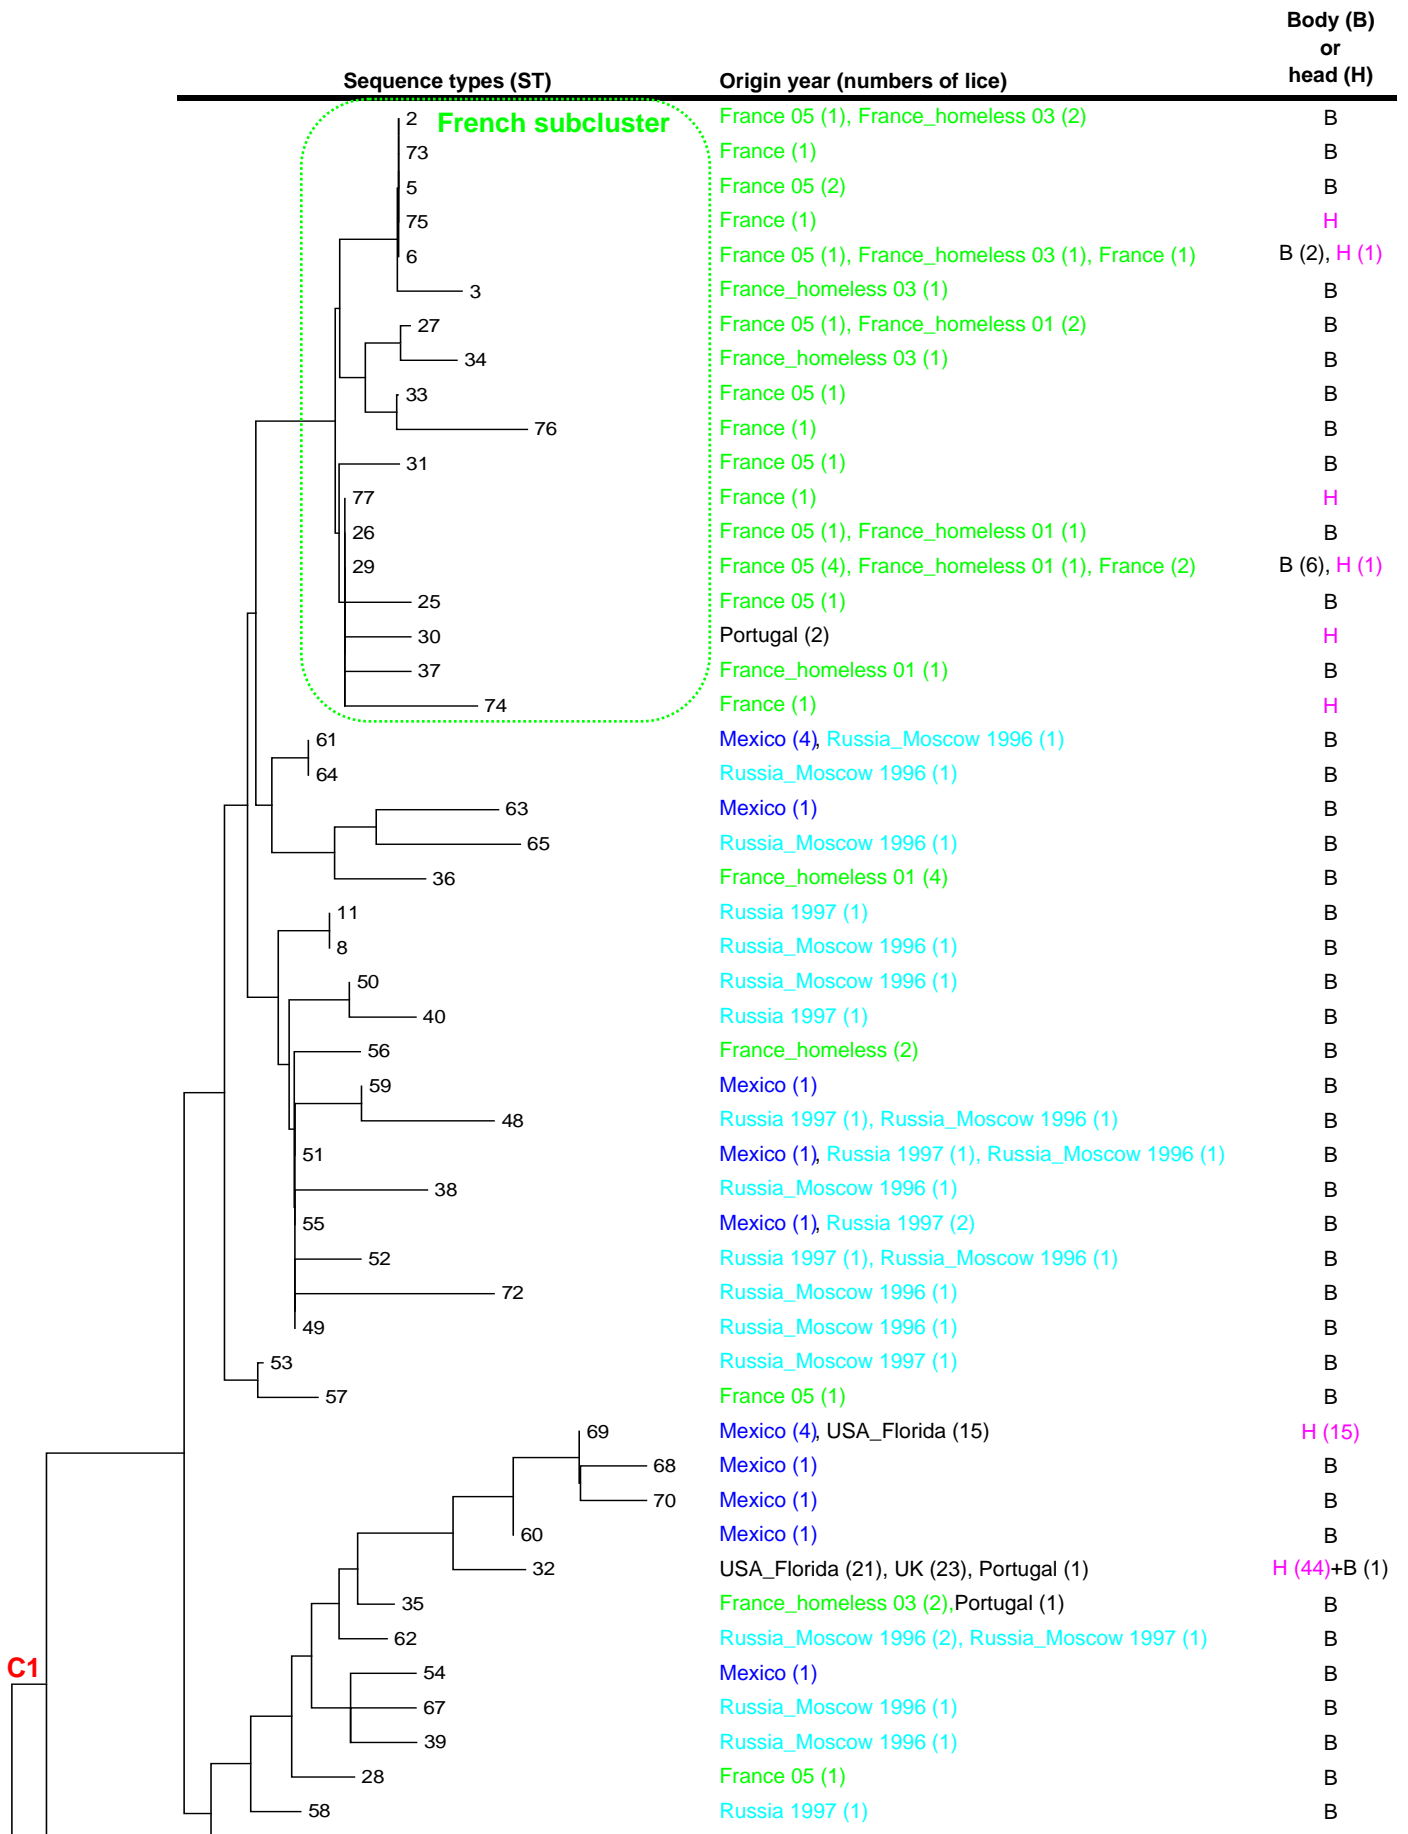

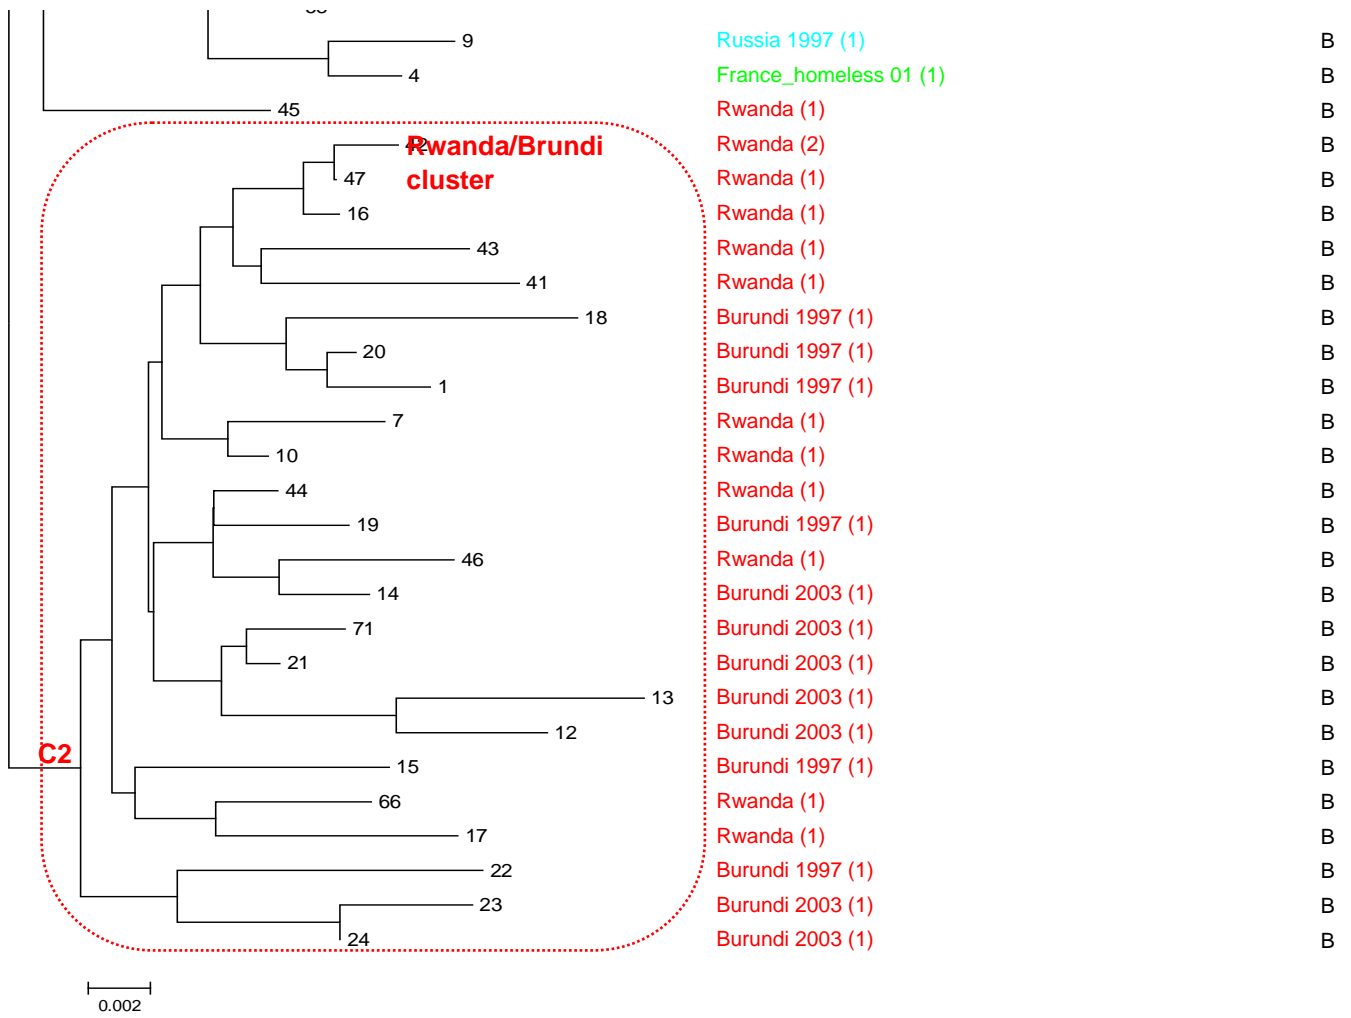

Supplement: pntd.0000641.s003.pdf [file pntd.0000641.s003.pdf]
