# Supplementary material for: Genotyping of Human Lice Suggests Multiple Emergences of Body Lice from Local Head Louse Populations
Source: PubMed Central journal article supplement (PMC2843630; doi:10.1371/journal.pntd.0000641), 2010-03-23
Supplement: pntd.0000641.s006.pdf [file pntd.0000641.s006.pdf]

|  | <b>Sequence types</b> | <b>Origin year (number)</b>      | <b>Body (B)<br/>or<br/>head (H)</b> |
|--|-----------------------|----------------------------------|-------------------------------------|
|  | 4                     | *91 lice (see below)             | H (6), B (85)                       |
|  | 1                     | Moscow 1996 (1)                  | B                                   |
|  | 11                    | France                           | H                                   |
|  | 6                     | Russia 1997 (1), UK (4), USA (3) | H (7), B (1)                        |
|  | 2                     | Mexico (8)                       | B                                   |
|  | 3                     | Moscow 1996 (1)                  | B                                   |
|  | 5                     | Moscow 1996 (1)                  | H                                   |
|  | 9                     | USA (2)                          | H                                   |
|  | 7                     | USA (12),                        | H                                   |
|  | 10                    | USA (19), UK (25)                | H                                   |
|  | 8                     | Mexico (1)                       | H                                   |
